# Supplementary material
Source: Copernicus journal article supplement (doi:10.5194/egusphere-2026-1377)
Supplement: Supplementary file 1 [file Supplement 2 radiocarbon dates_260312_new.pdf › Supplement 2 radiocarbon dates_260312_new.pdf]

Table S2. Summary of all radiocarbon dates from all the cores and the exposure GD-1. Calibrated radiocarbon ages younger than 16 cal kyr BP are highlighted in bold. GD-1 data according to Solov'eva et al. (accepted)

| Lab ID              | Sample ID              | Interval depth (m) | Sample depth (m) | Material                                           | Radiocarbon age (yr BP)         | 2 $\sigma$ age range (cal yr BP) | Mean age (cal yr BP) |
|---------------------|------------------------|--------------------|------------------|----------------------------------------------------|---------------------------------|----------------------------------|----------------------|
| AWI 2887.1.1        | Bbg 2/2                | 2.5                | 2.5              | plant fragments                                    | modern                          |                                  | modern               |
| AWI 2888.1.1        | Bbg 2/9                | 5.1                | 5.1              | plant fragments                                    | modern                          |                                  | modern               |
| IGAN 5855           | Bbg 2                  | 5.5                | 5.5              | bulk                                               | 31000 $\pm$ 100                 | 34625-35139                      | 34882                |
| IGAN 5855           | Bbg 6                  | 1.7                | 1.7              | bulk                                               | 21060 $\pm$ 50                  | 25221-25620                      | 25421                |
| AWI 5591.1.1        | Bbg 7/2                | 1                  | 1.0              | bulk                                               | 23115 $\pm$ 151                 | 27199-27698                      | 27449                |
| IGAN 5857           | Bbg 7_6.8m             | 6.8                | 6.8              | bulk                                               | 35680 $\pm$ 150                 | 39848-40765                      | 40307                |
| <b>AWI 2885.1.1</b> | <b>Bbg 7/5</b>         | <b>8.9</b>         | <b>8.9</b>       | <b>plant fragments</b>                             | <b>12844<math>\pm</math>105</b> | <b>15047-15658</b>               | <b>15353</b>         |
| IGAN 5858           | Bbg 7_10.8m            | 10.8               | 10.8             | bulk                                               | 24730 $\pm$ 70                  | 28538-28961                      | 28750                |
| AWI 5592.1.1        | Bbg 7/6                | 11.6               | 11.6             | bulk                                               | 31114 $\pm$ 379                 | 34695-36189                      | 35442                |
| <b>AWI 2886.1.1</b> | <b>Bbg 7/6</b>         | <b>11.6</b>        | <b>11.6</b>      | <b>plant fragments</b>                             | <b>3885<math>\pm</math>74</b>   | <b>4140-4449</b>                 | <b>4295</b>          |
| AWI 5588.1.1        | Bbg 8/3                | 0.5                | 0.5              | bulk                                               | 28730 $\pm$ 227                 | 32139-33789                      | 32964                |
| <b>AWI 2876.1.1</b> | <b>Bbg 8/9</b>         | <b>1.7-2.0</b>     | <b>1.9</b>       | <b>plant fragments</b>                             | <b>6124<math>\pm</math>51</b>   | <b>6881-7162</b>                 | <b>7022</b>          |
| <b>IGAN 5859</b>    | <b>Bbg 8/15</b>        | <b>2.55-2.65</b>   | <b>2.6</b>       | <b>bulk</b>                                        | <b>8500<math>\pm</math>30</b>   | <b>9473-9538</b>                 | <b>9506</b>          |
| <b>AWI 2877.1.1</b> | <b>Bbg 8/17</b>        | <b>3.65-3.85</b>   | <b>3.8</b>       | <b>plant fragments</b>                             | <b>6674<math>\pm</math>52</b>   | <b>7431-7617</b>                 | <b>7524</b>          |
| <b>AWI 2878.1.1</b> | <b>Bbg 8/21</b>        | <b>5.4-5.7</b>     | <b>5.6</b>       | <b>plant fragments</b>                             | <b>7025<math>\pm</math>54</b>   | <b>7725-7963</b>                 | <b>7844</b>          |
| <b>AWI 2879.1.1</b> | <b>Bbg 8/23</b>        | <b>7.5-8.0</b>     | <b>7.8</b>       | <b>plant fragments</b>                             | <b>6720<math>\pm</math>59</b>   | <b>7478-7676</b>                 | <b>7577</b>          |
| <b>AWI 2880.1.1</b> | <b>Bbg 8/30</b>        | <b>10.45-10.7</b>  | <b>10.6</b>      | <b>plant fragments</b>                             | <b>5860<math>\pm</math>82</b>   | <b>6450-6883</b>                 | <b>6667</b>          |
| <b>AWI 2881.1.1</b> | <b>Bbg 8/34</b>        | <b>12.2-12.6</b>   | <b>12.4</b>      | <b>plant fragments</b>                             | <b>13248<math>\pm</math>55</b>  | <b>15721-16097</b>               | <b>15909</b>         |
| <b>AWI 2882.1.1</b> | <b>Bbg 8/38</b>        | <b>16.7-17.0</b>   | <b>16.9</b>      | <b>plant fragments</b>                             | <b>5307<math>\pm</math>79</b>   | <b>5927-6220</b>                 | <b>6074</b>          |
| AWI 2883.1.1        | Bbg 8/41               | 17.7-18.1          | 17.9             | bulk                                               | 14208 $\pm$ 63                  | 17078-17411                      | 17245                |
| <b>AWI 2884.1.1</b> | <b>Bbg 8/46</b>        | <b>19.4-19.7</b>   | <b>19.5</b>      | <b>plant fragments</b>                             | <b>4612<math>\pm</math>72</b>   | <b>5207-5480</b>                 | <b>5344</b>          |
| IGAN 5861           | Bbg 8_20.1-20.35m      | 20.1-20.35         | 20.2             | plant fragments                                    | 23450 $\pm$ 70                  | 27461-27788                      | 27625                |
| <b>AWI 9191.1.1</b> | <b>Bbg 19_2.4-2.5m</b> | <b>2.4-2.6</b>     | <b>2.5</b>       | <b>twig and root fragments, graminoid rhizomes</b> | <b>5856<math>\pm</math>50</b>   | <b>6538-6789</b>                 | <b>6664</b>          |
| <b>AWI 9192.1.1</b> | <b>Bbg 19_4.2-4.4m</b> | <b>4.2-4.5</b>     | <b>4.4</b>       | <b>moss stems and leaves, small twig fragments</b> | <b>7164<math>\pm</math>54</b>   | <b>7919-8043</b>                 | <b>7981</b>          |

| Lab ID                    | Sample ID       | Interval depth (m) | Sample depth (m) | Material                                                                                      | Radiocarbon age (yr BP) | 2σ age range (cal yr BP) | Mean age (cal yr BP) |
|---------------------------|-----------------|--------------------|------------------|-----------------------------------------------------------------------------------------------|-------------------------|--------------------------|----------------------|
| AWI 9193.1.1              | Bbg 19_5.0-5.2m | 5.0-5.3            | 5.2              | plant fragments                                                                               | 5784±61                 | 6415-6735                | 6575                 |
| AWI 9194.1.1              | Bbg 19_5.8-5.9m | 5.8-5.10           | 6.0              | moss stems and leaves, small twig and woody root fragments                                    | 5797±52                 | 6485-6736                | 6611                 |
| AWI 9195.1.1              | Bbg 19_6.0-6.2m | 6.0-6.3            | 6.2              | plant fragments                                                                               | 5780±93                 | 6392-6792                | 6592                 |
| IGAN 5195                 | GD 1            | 0.07-0.17          | 0.1              | bulk                                                                                          | 275±30                  | 283-443                  | 363                  |
| IGAN 5196                 | GD 1            | 0.17-0.35          | 0.3              | bulk                                                                                          | 140±30                  | 50-279                   | 165                  |
| IGAN 5197                 | GD 1            | 0.50-0.58          | 0.5              | bulk                                                                                          | 920±40                  | 768-916                  | 842                  |
| IGAN 5198                 | GD 1            | 0.58-0.66          | 0.6              | bulk                                                                                          | 1990±80                 | 1721-2122                | 1922                 |
| IGAN 5180                 | GD 1            | 0.66-0.67          | 0.7              | bulk                                                                                          | 4160±60                 | 4527-4837                | 4682                 |
| IGAN 5182                 | GD 1            | 1.10-1.15          | 1.3              | bulk                                                                                          | 4600±60                 | 5214-5471                | 5343                 |
| IGAN <sub>AMS</sub> *5183 | GD 1            | 3.15-3.20          | 3.2              | bulk                                                                                          | 13995±40                | 16880-17129              | 17005                |
| IGAN <sub>AMS</sub> *5184 | GD 1            | 3.20-3.45          | 3.3              | bulk                                                                                          | 14520±40                | 17460-17912              | 17686                |
| IGAN 5185                 | GD 1            | 3.45-3.70          | 3.6              | bulk                                                                                          | 5440±280                | 5596-6797                | 6197                 |
| AWI 2560.1.1              | Bbg 9/2         | 22.65-22.8         | 22.7             | moss leaves, chiton remains                                                                   | 12665±130               | 14784-15512              | 15148                |
| AWI 2561.1.1              | Bbg 9/4         | 23.8-24.0          | 23.9             | moss leaves and stems                                                                         | 10814±121               | 12615-13069              | 12842                |
| AWI 2633.1.1              | Bbg 10/14C      | 0.35-0.39          | 0.4              | vascular plant roots and rootlets                                                             | modern                  |                          | modern               |
| AWI 5589.1.1              | Bbg 10/5        | 0.77-0.8           | 0.8              | bulk                                                                                          | 28494±223               |                          |                      |
| AWI 5590.1.1              | Bbg 10/9        | 1.55-1.75          | 1.6              | bulk                                                                                          | 37262±614               |                          |                      |
| AWI 2634.1.1              | Bbg 10/13       | 2.8-3.0            | 2.9              | moss stems with leaves.<br>Cyperaceae/sedge leaf fragments, 2 larger vascular plant fragments | 10133±58                | 11597-11940              | 11,769               |
| AWI 2635.1.1              | Bbg 10/18       | 4.1-4.5            | 4.3              | plant fragments, moss stems                                                                   | 19,510±220              | 22,987-23879             | 23,433               |
| AWI 2636.1.1              | Bbg 10/29b      | 9.75-10.0          | 9.9              | plant fragments, moss stems                                                                   | 16,616±172              | 19,602-20459             | 20,031               |
| AWI 2637.1.1              | Bbg 10/34       | 11.9-12.0          | 12.0             | moss leaves fragments, vascular plant remains, rootlets                                       | 5353±120                | 5902-6355                | 6129                 |
| AWI 2561.1.1              | Bbg 16_0.3-0.5m | 0.3-0.6            | 0.4              | small twig and woody root fragments                                                           | 218±51                  | 132-327                  | 230                  |

| Lab ID              | Sample ID              | Interval depth (m) | Sample depth (m) | Material                                                                                     | Radiocarbon age (yr BP) | 2σ age range (cal yr BP) | Mean age (cal yr BP) |
|---------------------|------------------------|--------------------|------------------|----------------------------------------------------------------------------------------------|-------------------------|--------------------------|----------------------|
| <b>AWI 9887.1.1</b> | <b>Bbg 16_4.2-4.3m</b> | <b>4.2-4.4</b>     | <b>4.3</b>       | <b>moss stems with leaves, unidentified terrestrial vascular plant remains</b>               | <b>9626±109</b>         | <b>10678-11235</b>       | <b>10957</b>         |
| <b>AWI 2560.1.1</b> | <b>Bbg 16_4.8-5.0m</b> | <b>4.8-5.1</b>     | <b>4.9</b>       | <b>dwarf shrub leaf fragments, fine root fragments, moss leaves, Graminae root fragments</b> | <b>5043±90</b>          | <b>5596-5984</b>         | <b>5790</b>          |
| AWI 5573.1.1        | Bbg 13/3               | 0.3-0.5            | 0.4              | bulk                                                                                         | 36242±351               |                          |                      |
| AWI 5574.1.1        | Bbg 13/5               | 0.8-1.0            | 0.9              | bulk                                                                                         | 29402±169               |                          |                      |
| AWI 5575.1.1        | Bbg 13/7               | 3.3-3.4            | 3.4              | bulk                                                                                         | 33631±397               |                          |                      |
| AWI 5576.1.1        | Bbg 13/10              | 17.0-17.2          | 17.1             | bulk                                                                                         | 37778±669               |                          |                      |
| AWI 5577.1.1        | Bbg 13/12              | 21.0-21.2          | 21.1             | bulk                                                                                         | 35662±196               |                          |                      |
| AWI 5578.1.1        | Bbg 13/15              | 21.7-21.8          | 21.75            | bulk                                                                                         | 36604±563               |                          |                      |
| AWI 5579.1.1        | Bbg 14/2               | 0.6-0.8            | 0.7              | bulk                                                                                         | 18420±61                |                          |                      |
| AWI 5580.1.1        | Bbg 14/3               | 1.0-1.1            | 1.1              | bulk                                                                                         | 22179±82                |                          |                      |
| AWI 5581.1.1        | Bbg 15/1               | 0.5-0.6            | 0.6              | bulk                                                                                         | 33280±249               |                          |                      |
| AWI 5582.1.1        | Bbg 15/4               | 2.0-2.2            | 2.1              | bulk                                                                                         | 36551±361               |                          |                      |
| AWI 5583.1.1        | Bbg 15/6               | 4.2-4.3            | 4.3              | bulk                                                                                         | 29369±164               |                          |                      |
| AWI 5584.1.1        | Bbg 15/9               | 5.7-5.9            | 5.8              | bulk                                                                                         | 29074±158               |                          |                      |
| <b>AWI 9888.1.3</b> | <b>Bbg 15/9</b>        | <b>5.7-5.9</b>     | <b>5.8</b>       | <b>moss stems with leaves, graminoid leaves, and root fragments</b>                          | <b>9583±103</b>         | <b>10,653-11198</b>      | <b>10,926</b>        |
| AWI 5585.1.1        | Bbg 15/12              | 9.3-9.5            | 9.4              | bulk                                                                                         | 34395±284               |                          |                      |
| AWI 5586.1.2        | Bbg 15/15              | 11.2-11.5          | 11.4             | bulk                                                                                         | 33612±260               |                          |                      |
| AWI 5587.1.1        | Bbg 15/18              | 12.9-13.0          | 13.0             | bulk                                                                                         | 32932±241               |                          |                      |
