# Supplementary material
Source: Copernicus journal article supplement (doi:10.5194/egusphere-2026-1377)

**Figure S3 Study subareas**

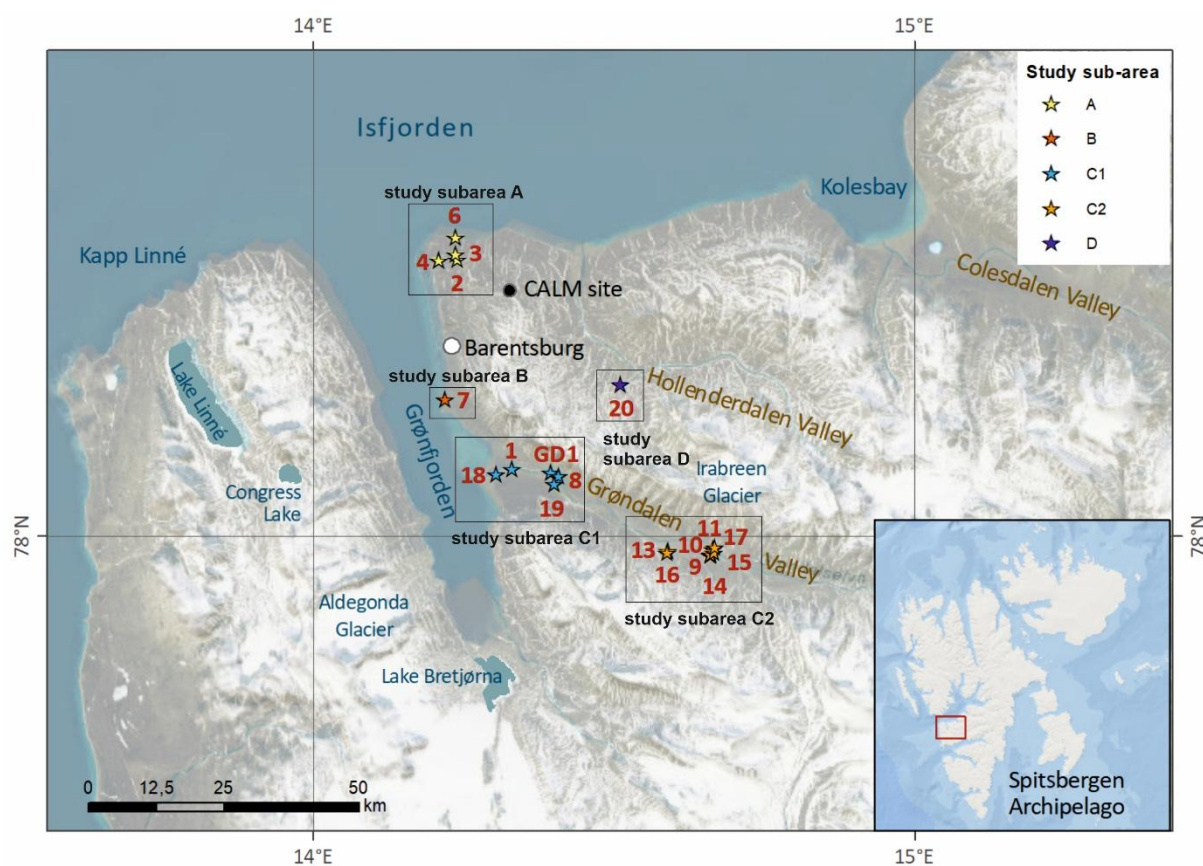

**Figure S3.1 Study subareas A (Isfjord terraces)**

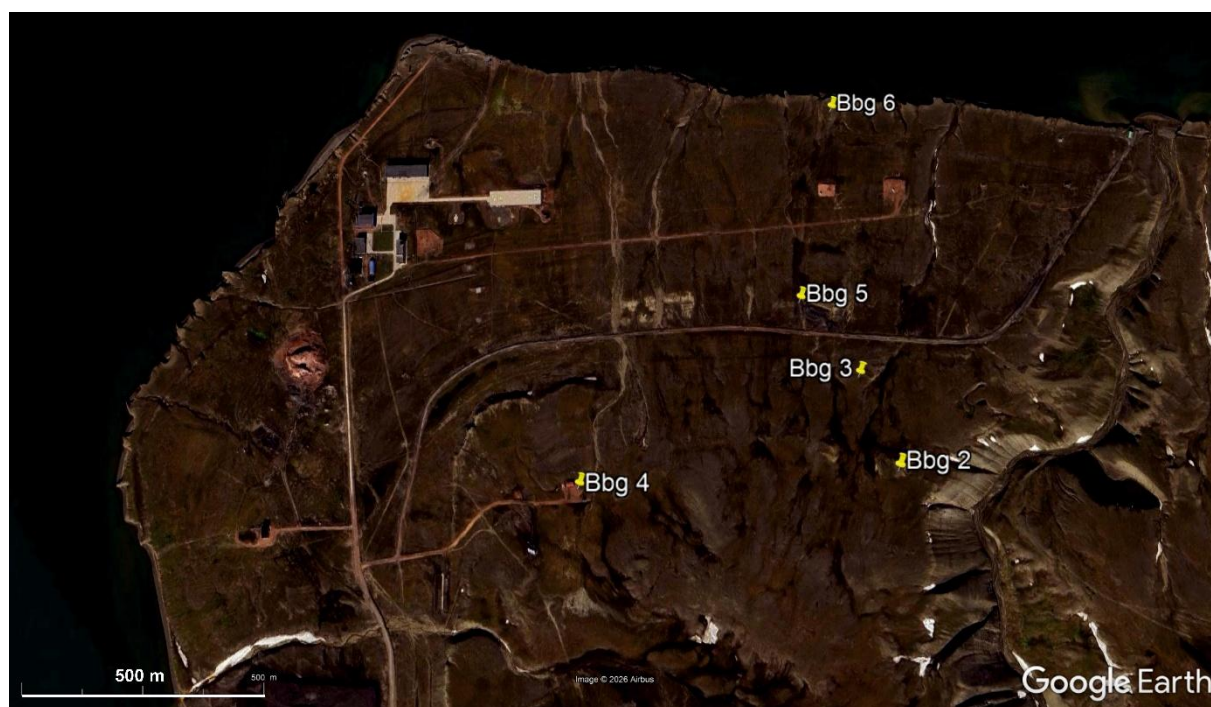



**Figure S3.2 Study subarea B (Kap Finneset)**

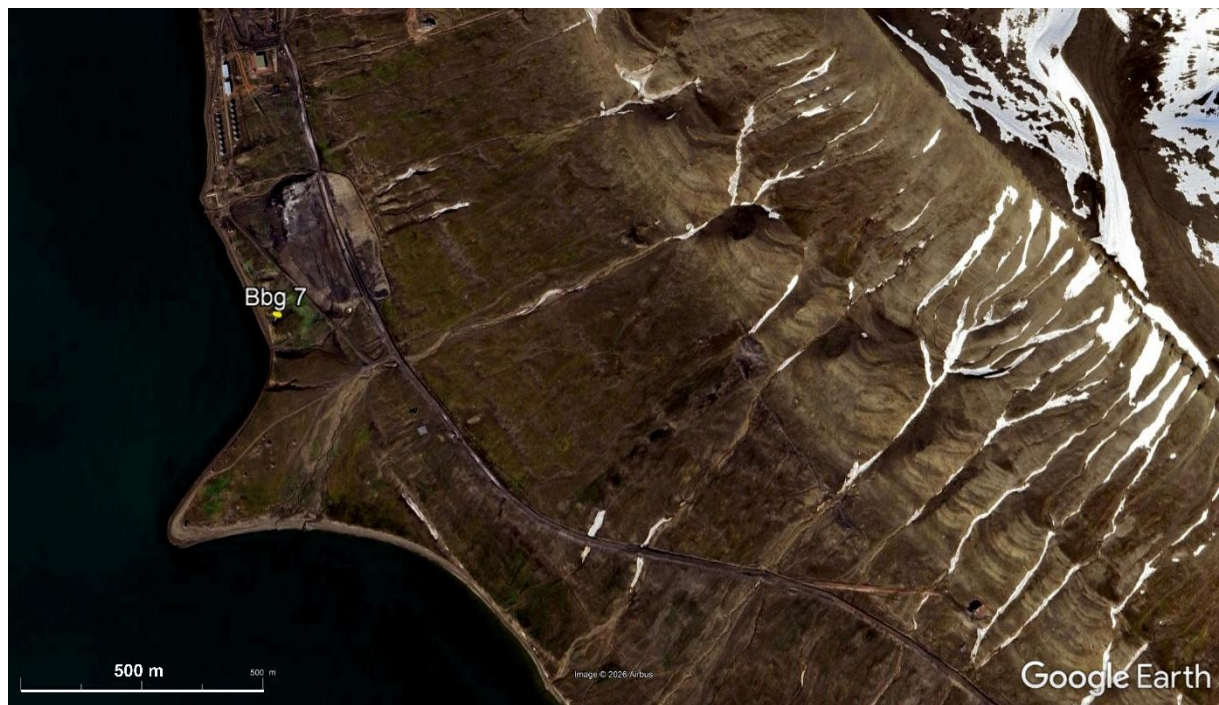

**Figure S3.3 Study subarea C1**

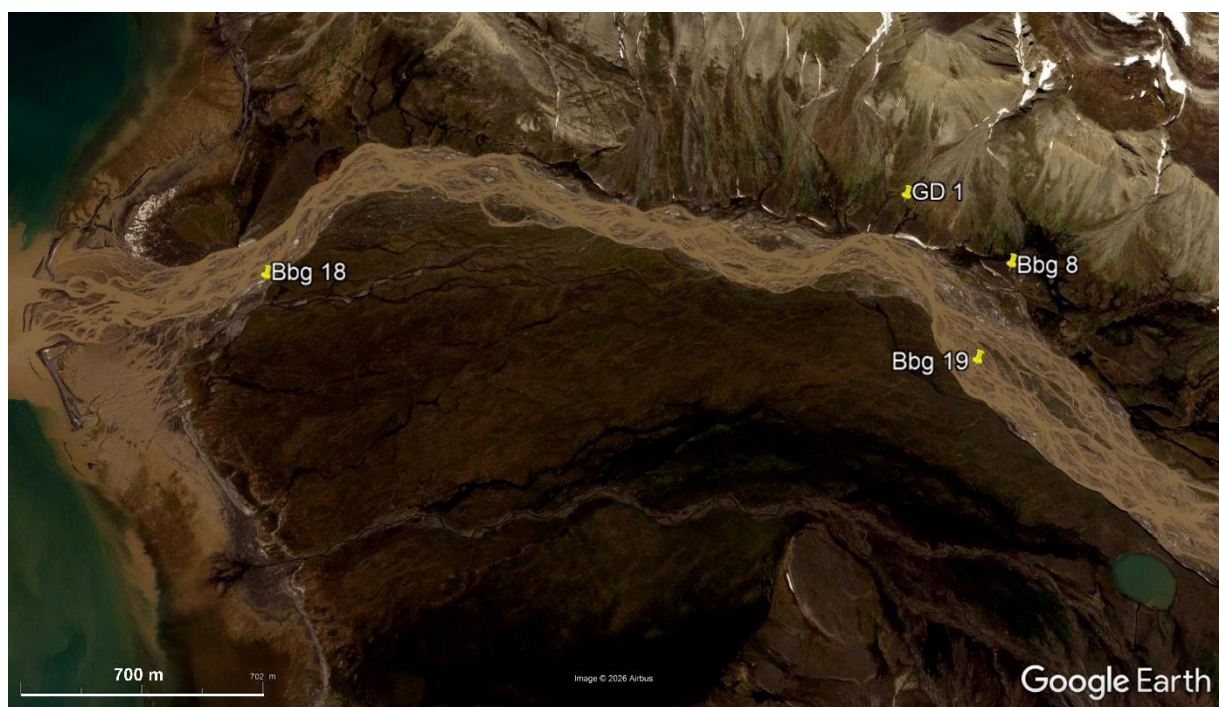



**Figure S3.4**

**Study subarea C2A (Pingo Nori, front part of the middle part of the Grøndalen Valley)**

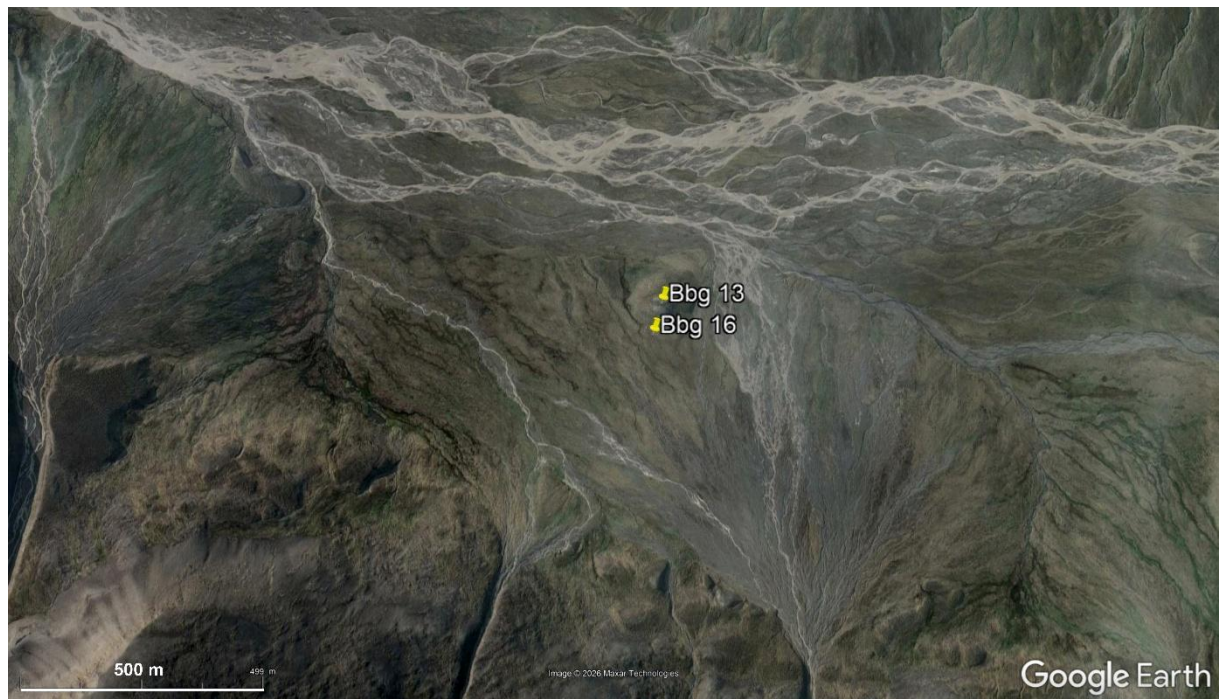

**Figure S3.5**

**Study subarea C2B (Pingos Fili and Kili, middle part of the Grøndalen Valley)**

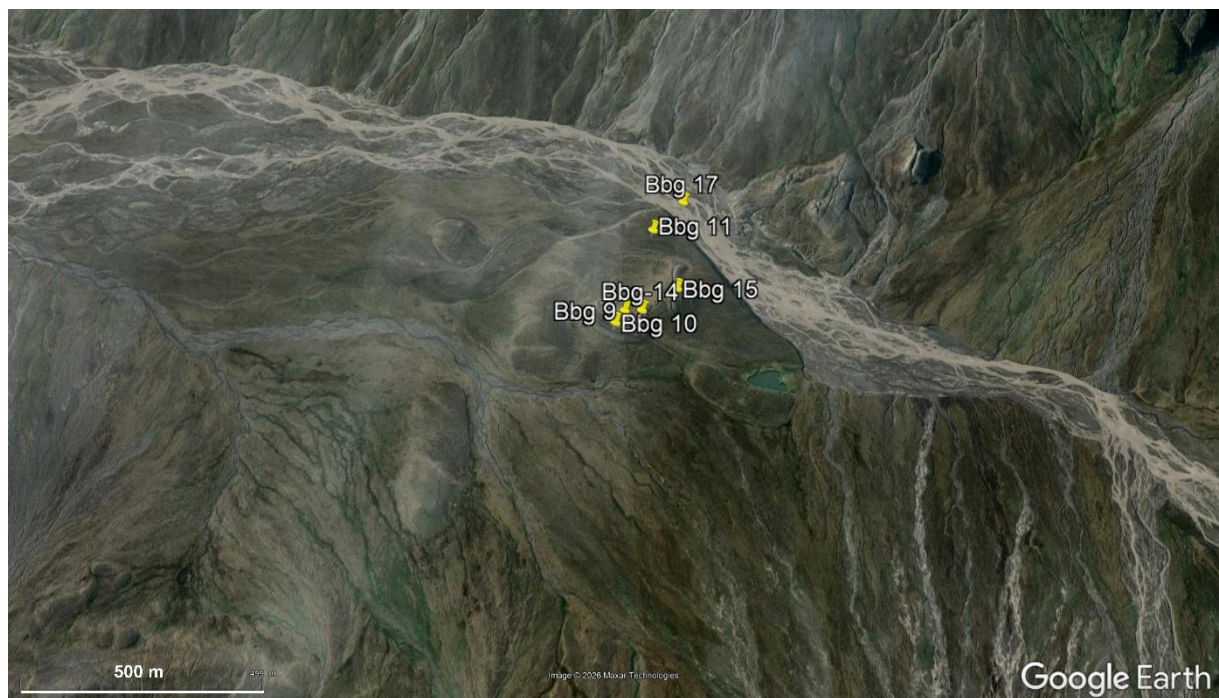

**Figure S3.6 Study subarea D (Hollendardalen Valley)**

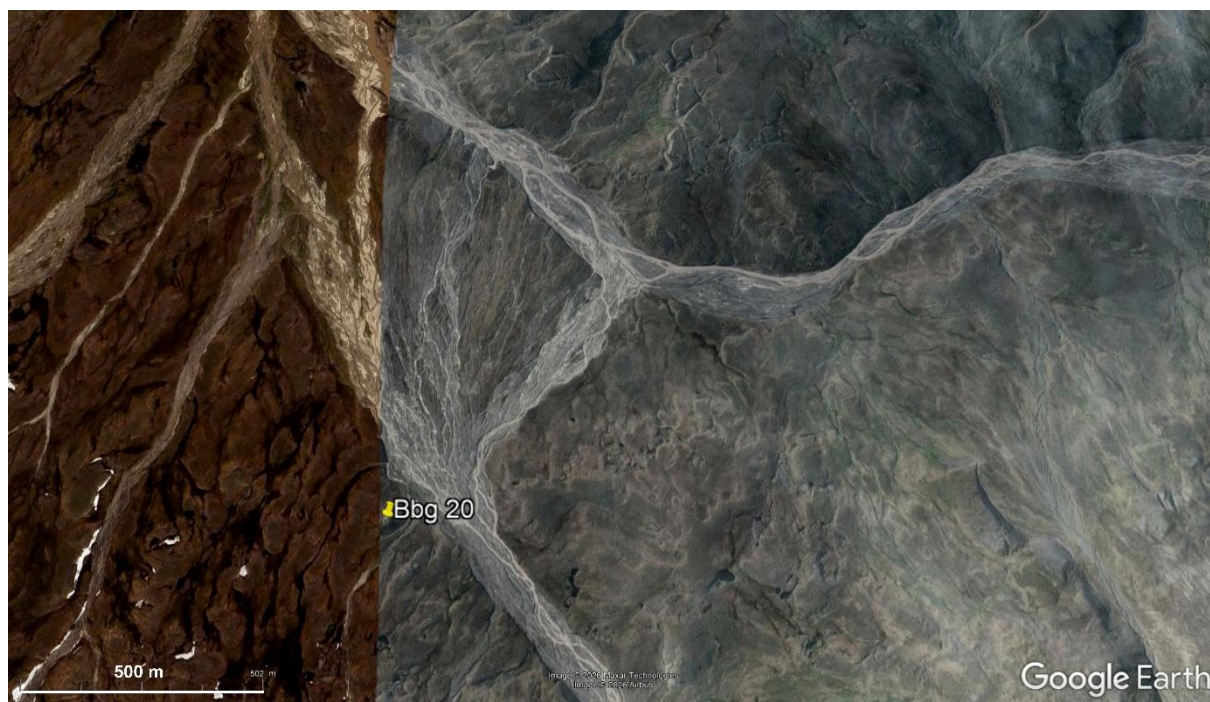

Supplement: Supplementary file 2 [file Supplement 3 subareas 260312_new.pdf › Supplement 3 subareas 260312_new.pdf]
